# Supplementary material for: Identification of Four Metabolic Subtypes of Glioma Based on Glycolysis-Cholesterol Synthesis Genes
Source: Hindawi journal article supplement (doi:10.1155/2022/9448144), 2022-02-21
Supplement: f5 [file 9448144.f5.pdf]

Supplementary Table1: Glycolysis and cholesterol related gene set

| Genes   | Type        |
|---------|-------------|
| ALDOA   | GLYCOLYSIS  |
| ENO1    | GLYCOLYSIS  |
| ENO3    | GLYCOLYSIS  |
| DHCR7   | CHOLESTEROL |
| MVK     | CHOLESTEROL |
| CYP51A1 | CHOLESTEROL |
| DHCR24  | CHOLESTEROL |
| PGK1    | GLYCOLYSIS  |
| IDI2    | CHOLESTEROL |
| PFKM    | GLYCOLYSIS  |
| PKLR    | GLYCOLYSIS  |
| PPP2CA  | GLYCOLYSIS  |
| ALDOB   | GLYCOLYSIS  |
| GAPDH   | GLYCOLYSIS  |
| EBP     | CHOLESTEROL |
| TM7SF2  | CHOLESTEROL |
| MVD     | CHOLESTEROL |
| MSMO1   | CHOLESTEROL |
| PFKFB4  | GLYCOLYSIS  |
| PFKFB2  | GLYCOLYSIS  |
| HMGCS1  | CHOLESTEROL |
| TPI1    | GLYCOLYSIS  |
| GGPS1   | CHOLESTEROL |
| SQLE    | CHOLESTEROL |
| ENO2    | GLYCOLYSIS  |
| PFKL    | GLYCOLYSIS  |
| HSD17B7 | CHOLESTEROL |
| PPP2R5D | GLYCOLYSIS  |
| PFKFB1  | GLYCOLYSIS  |
| PFKFB3  | GLYCOLYSIS  |
| HMGCR   | CHOLESTEROL |
| GPI     | GLYCOLYSIS  |
| GAPDHS  | GLYCOLYSIS  |
| FDFT1   | CHOLESTEROL |
| PMVK    | CHOLESTEROL |
| PPP2R1B | GLYCOLYSIS  |
| PPP2R1A | GLYCOLYSIS  |
| IDI1    | CHOLESTEROL |
| LBR     | CHOLESTEROL |
| ALDOC   | GLYCOLYSIS  |
| LSS     | CHOLESTEROL |
| PGAM1   | GLYCOLYSIS  |

---

|        |             |
|--------|-------------|
| PFKP   | GLYCOLYSIS  |
| NSDHL  | CHOLESTEROL |
| PPP2CB | GLYCOLYSIS  |
| FDPS   | CHOLESTEROL |
| TPI1P1 | GLYCOLYSIS  |

---
