# Supplementary material for: Identification of Four Metabolic Subtypes of Glioma Based on Glycolysis-Cholesterol Synthesis Genes
Source: Hindawi journal article supplement (doi:10.1155/2022/9448144), 2022-02-21
Supplement: f6 [file 9448144.f6.pdf]

Supplementary Table2: Corresponding four subtype information in TCGA sample

| samples         | Cholesterol | Glycolysis   | type        |
|-----------------|-------------|--------------|-------------|
| TCGA-02-0047-01 | 1.12759271  | 0.935006094  | Mixed       |
| TCGA-02-0055-01 | -0.1812564  | 0.034317589  | Glycolysis  |
| TCGA-02-2483-01 | -1.0338462  | -0.113544946 | Quiescent   |
| TCGA-02-2485-01 | 0.38808741  | -1.001843888 | Cholesterol |
| TCGA-02-2486-01 | -0.7979778  | 0.358086162  | Glycolysis  |
| TCGA-06-0125-01 | 1.27576193  | 0.630362355  | Mixed       |
| TCGA-06-0129-01 | -0.1875464  | -1.487491631 | Quiescent   |
| TCGA-06-0130-01 | -0.6380901  | -0.82489189  | Quiescent   |
| TCGA-06-0132-01 | -1.3295485  | 0.331785145  | Glycolysis  |
| TCGA-06-0138-01 | -1.7982011  | -0.933939316 | Quiescent   |
| TCGA-06-0139-01 | -2.3281581  | -1.475520541 | Quiescent   |
| TCGA-06-0141-01 | -1.6129036  | -1.529972442 | Quiescent   |
| TCGA-06-0156-01 | -0.3368012  | 0.341400851  | Glycolysis  |
| TCGA-06-0157-01 | -0.0334662  | -0.910578943 | Quiescent   |
| TCGA-06-0158-01 | -0.1584973  | 0.124115504  | Glycolysis  |
| TCGA-06-0168-01 | 0.10237126  | 0.12872543   | Mixed       |
| TCGA-06-0174-01 | -0.0487929  | 2.042757503  | Glycolysis  |
| TCGA-06-0178-01 | -1.8006812  | -0.40564902  | Quiescent   |
| TCGA-06-0184-01 | 0.16542524  | -0.061027104 | Cholesterol |
| TCGA-06-0187-01 | 0.98595154  | 1.342483245  | Mixed       |
| TCGA-06-0190-01 | 0.33114429  | 0.631015757  | Mixed       |
| TCGA-06-0210-01 | -1.3934596  | 1.905329233  | Glycolysis  |
| TCGA-06-0211-01 | 0.77305047  | -0.220417432 | Cholesterol |
| TCGA-06-0219-01 | -0.1866022  | -0.380791498 | Quiescent   |
| TCGA-06-0238-01 | -0.6805058  | -1.411827154 | Quiescent   |
| TCGA-06-0644-01 | 1.04180437  | 0.397150708  | Mixed       |
| TCGA-06-0645-01 | -0.9893474  | -0.087916662 | Quiescent   |
| TCGA-06-0646-01 | -0.1058003  | 0.685678647  | Glycolysis  |
| TCGA-06-0649-01 | -0.7097684  | -1.608768187 | Quiescent   |
| TCGA-06-0686-01 | 0.68710857  | 0.782922766  | Mixed       |
| TCGA-06-0743-01 | -0.0164999  | -1.613772553 | Quiescent   |
| TCGA-06-0744-01 | -1.1420618  | -1.570127085 | Quiescent   |
| TCGA-06-0745-01 | -1.313898   | 0.565686923  | Glycolysis  |
| TCGA-06-0747-01 | -0.1983821  | -0.232398723 | Quiescent   |
| TCGA-06-0749-01 | -0.417389   | -0.271270627 | Quiescent   |
| TCGA-06-0750-01 | -0.322927   | -0.027878598 | Quiescent   |
| TCGA-06-0878-01 | -0.2333261  | -0.170508156 | Quiescent   |
| TCGA-06-0882-01 | 0.47280794  | -0.744789939 | Cholesterol |
| TCGA-06-1804-01 | 0.16523941  | 0.1518318    | Mixed       |
| TCGA-06-2557-01 | -1.0956908  | -1.019398039 | Quiescent   |
| TCGA-06-2558-01 | 0.2436276   | -0.121823675 | Cholesterol |
| TCGA-06-2559-01 | 0.03111875  | 1.888204028  | Mixed       |

---

|                 |            |              |             |
|-----------------|------------|--------------|-------------|
| TCGA-06-2561-01 | -0.6212683 | -0.445945455 | Quiescent   |
| TCGA-06-2562-01 | 0.03621265 | 0.164945406  | Mixed       |
| TCGA-06-2563-01 | -0.0048575 | 0.366034488  | Glycolysis  |
| TCGA-06-2564-01 | -0.6142382 | -0.480049963 | Quiescent   |
| TCGA-06-2565-01 | -0.9094002 | -0.042698385 | Quiescent   |
| TCGA-06-2567-01 | -0.2279055 | 0.644360604  | Glycolysis  |
| TCGA-06-2569-01 | 1.3410342  | -1.417811042 | Cholesterol |
| TCGA-06-2570-01 | -0.0361417 | -0.325359849 | Quiescent   |
| TCGA-06-5408-01 | 0.70549407 | 1.378516165  | Mixed       |
| TCGA-06-5410-01 | -0.6362709 | -0.275597806 | Quiescent   |
| TCGA-06-5411-01 | -0.1483172 | 1.316175178  | Glycolysis  |
| TCGA-06-5412-01 | -1.6321111 | -0.294211303 | Quiescent   |
| TCGA-06-5413-01 | 0.89691362 | -0.881812708 | Cholesterol |
| TCGA-06-5414-01 | 1.12434148 | -0.083887748 | Cholesterol |
| TCGA-06-5416-01 | 1.51224056 | 0.986485975  | Mixed       |
| TCGA-06-5417-01 | 0.56381562 | -0.280345212 | Cholesterol |
| TCGA-06-5418-01 | -0.2444764 | 1.302239886  | Glycolysis  |
| TCGA-06-5856-01 | 0.24684277 | 1.185147357  | Mixed       |
| TCGA-06-5858-01 | 1.4138849  | 1.827588177  | Mixed       |
| TCGA-06-5859-01 | 0.58557299 | -1.013742711 | Cholesterol |
| TCGA-08-0386-01 | 3.67272911 | 0.865476509  | Mixed       |
| TCGA-12-0616-01 | 0.0281218  | -1.369654387 | Cholesterol |
| TCGA-12-0618-01 | 0.31331533 | 1.697368516  | Mixed       |
| TCGA-12-0619-01 | 0.9674606  | -0.10362686  | Cholesterol |
| TCGA-12-0821-01 | -2.0246858 | 0.18127174   | Glycolysis  |
| TCGA-12-1597-01 | 0.19392777 | 1.204237084  | Mixed       |
| TCGA-12-3650-01 | 0.84761774 | -0.258179362 | Cholesterol |
| TCGA-12-3652-01 | 1.66471161 | 1.002509852  | Mixed       |
| TCGA-12-3653-01 | 0.80656733 | -0.451924704 | Cholesterol |
| TCGA-12-5295-01 | -1.6202002 | -0.963153591 | Quiescent   |
| TCGA-12-5299-01 | -0.0889466 | 1.160183458  | Glycolysis  |
| TCGA-14-0781-01 | -1.1399204 | 0.386197858  | Glycolysis  |
| TCGA-14-0787-01 | 1.02266037 | -0.493925205 | Cholesterol |
| TCGA-14-0789-01 | -1.6526854 | 1.44710425   | Glycolysis  |
| TCGA-14-0790-01 | -0.4565164 | -0.485165278 | Quiescent   |
| TCGA-14-0817-01 | -0.9359247 | -1.474835322 | Quiescent   |
| TCGA-14-0871-01 | -0.1697656 | -0.598330102 | Quiescent   |
| TCGA-14-1034-01 | 0.40897308 | 0.838432537  | Mixed       |
| TCGA-14-1823-01 | -0.4730314 | -0.638252469 | Quiescent   |
| TCGA-14-1825-01 | 1.87695127 | -0.387101434 | Cholesterol |
| TCGA-14-1829-01 | -1.3712458 | -2.078147177 | Quiescent   |
| TCGA-14-2554-01 | -0.9676467 | -1.3994492   | Quiescent   |
| TCGA-15-0742-01 | 0.48632409 | -0.226639247 | Cholesterol |
| TCGA-15-1444-01 | 0.69553457 | -1.008079892 | Cholesterol |

---

---

|                 |            |              |             |
|-----------------|------------|--------------|-------------|
| TCGA-16-0846-01 | 0.39066336 | -1.11156911  | Cholesterol |
| TCGA-16-1045-01 | -0.4106003 | 0.370354386  | Glycolysis  |
| TCGA-19-1390-01 | 0.97730623 | 1.340462147  | Mixed       |
| TCGA-19-1787-01 | 1.1828032  | 0.553250239  | Mixed       |
| TCGA-19-2619-01 | 1.55815821 | 0.462115455  | Mixed       |
| TCGA-19-2620-01 | -0.6704299 | -0.333895477 | Quiescent   |
| TCGA-19-2624-01 | 1.53756991 | 0.522316095  | Mixed       |
| TCGA-19-2625-01 | -0.1022395 | 0.74513127   | Glycolysis  |
| TCGA-19-2629-01 | -0.7087387 | -1.184411501 | Quiescent   |
| TCGA-19-4065-01 | -0.1790761 | -0.15436544  | Quiescent   |
| TCGA-19-5960-01 | -1.0417262 | -0.606589933 | Quiescent   |
| TCGA-26-1442-01 | -0.7121149 | -0.75678803  | Quiescent   |
| TCGA-26-5132-01 | 0.25568326 | 1.198569152  | Mixed       |
| TCGA-26-5133-01 | 0.79761444 | 0.245327057  | Mixed       |
| TCGA-26-5134-01 | -1.371874  | -1.225942438 | Quiescent   |
| TCGA-26-5135-01 | -0.2846728 | 0.512668883  | Glycolysis  |
| TCGA-26-5136-01 | 0.56536474 | -1.306378266 | Cholesterol |
| TCGA-26-5139-01 | -0.1277804 | 0.66064406   | Glycolysis  |
| TCGA-27-1830-01 | -1.0162516 | -0.52189104  | Quiescent   |
| TCGA-27-1831-01 | -1.6422034 | -2.353555394 | Quiescent   |
| TCGA-27-1832-01 | -0.1370259 | 0.225463482  | Glycolysis  |
| TCGA-27-1834-01 | 1.23310617 | -1.459526976 | Cholesterol |
| TCGA-27-1835-01 | -1.683241  | -1.402524481 | Quiescent   |
| TCGA-27-1837-01 | 1.18678122 | -1.084268334 | Cholesterol |
| TCGA-27-2519-01 | -0.8288688 | -1.031307    | Quiescent   |
| TCGA-27-2521-01 | 0.5746225  | -0.441881483 | Cholesterol |
| TCGA-27-2523-01 | 0.92674615 | 0.765758093  | Mixed       |
| TCGA-27-2524-01 | -0.206005  | 0.995578324  | Glycolysis  |
| TCGA-27-2526-01 | 0.87230777 | -1.355985768 | Cholesterol |
| TCGA-27-2528-01 | 0.4030767  | 0.300690414  | Mixed       |
| TCGA-28-1747-01 | 0.92381167 | -1.371681786 | Cholesterol |
| TCGA-28-1753-01 | -0.7177915 | -0.639930152 | Quiescent   |
| TCGA-28-2499-01 | -1.1823825 | 0.030657298  | Glycolysis  |
| TCGA-28-2509-01 | 2.41374821 | 2.257852745  | Mixed       |
| TCGA-28-2510-01 | 0.84204866 | 0.890138613  | Mixed       |
| TCGA-28-2513-01 | -0.4058089 | -1.439571838 | Quiescent   |
| TCGA-28-2514-01 | 1.52914135 | 1.086759316  | Mixed       |
| TCGA-28-5204-01 | 1.5387492  | -0.151902066 | Cholesterol |
| TCGA-28-5207-01 | -0.1245461 | -0.413084697 | Quiescent   |
| TCGA-28-5208-01 | -0.2429871 | -0.710880906 | Quiescent   |
| TCGA-28-5209-01 | 0.52639913 | 0.530793601  | Mixed       |
| TCGA-28-5213-01 | -0.8012383 | -1.310166607 | Quiescent   |
| TCGA-28-5215-01 | 1.85387953 | -0.254581869 | Cholesterol |
| TCGA-28-5216-01 | 1.03218432 | 1.778283753  | Mixed       |

---

---

|                 |            |              |             |
|-----------------|------------|--------------|-------------|
| TCGA-28-5218-01 | -2.2543798 | -0.843974779 | Quiescent   |
| TCGA-28-5220-01 | 1.62736132 | -0.838153611 | Cholesterol |
| TCGA-32-1970-01 | 0.77309718 | -0.349234782 | Cholesterol |
| TCGA-32-1980-01 | -1.1444557 | 1.673452304  | Glycolysis  |
| TCGA-32-1982-01 | -1.0896501 | -0.134360436 | Quiescent   |
| TCGA-32-2615-01 | -0.3861373 | 1.06705951   | Glycolysis  |
| TCGA-32-2616-01 | 0.7033062  | 2.264600326  | Mixed       |
| TCGA-32-2632-01 | -1.0880472 | -0.731999732 | Quiescent   |
| TCGA-32-2634-01 | 0.04376612 | 0.406555169  | Mixed       |
| TCGA-32-2638-01 | -0.6661731 | 0.083830953  | Glycolysis  |
| TCGA-32-4213-01 | -0.6551403 | -0.183196708 | Quiescent   |
| TCGA-32-5222-01 | -1.0111685 | -0.239401999 | Quiescent   |
| TCGA-41-2571-01 | 0.94003268 | 2.464049303  | Mixed       |
| TCGA-41-2572-01 | 0.8954679  | 0.075676516  | Mixed       |
| TCGA-41-3915-01 | 0.29524771 | 1.280163293  | Mixed       |
| TCGA-41-4097-01 | 0.3587066  | 1.415304637  | Mixed       |
| TCGA-41-5651-01 | 1.06095073 | 1.456625495  | Mixed       |
| TCGA-76-4925-01 | -0.0268202 | 1.604339053  | Glycolysis  |
| TCGA-76-4926-01 | -0.2972601 | -0.22172186  | Quiescent   |
| TCGA-76-4927-01 | -0.6811386 | -0.194332655 | Quiescent   |
| TCGA-76-4928-01 | 0.19399192 | -0.524795569 | Cholesterol |
| TCGA-76-4929-01 | 0.19500066 | 0.30477322   | Mixed       |
| TCGA-76-4931-01 | 1.64521314 | 1.102121495  | Mixed       |
| TCGA-76-4932-01 | -0.0912921 | 0.685426755  | Glycolysis  |

---
