# Supplementary material for: Identification of Four Metabolic Subtypes of Glioma Based on Glycolysis-Cholesterol Synthesis Genes
Source: Hindawi journal article supplement (doi:10.1155/2022/9448144), 2022-02-21
Supplement: f7 [file 9448144.f7.pdf]

Supplementary Table3: Glycolysis / cholesterol dysregulated genes

|          | logFC    | AveExpr  | t        | P.Value  | adj.P.Val | B        |
|----------|----------|----------|----------|----------|-----------|----------|
| ENO2     | 1.153408 | 7.382357 | 7.625448 | 2.59E-10 | 5.03E-06  | 12.88502 |
| KISS1R   | 1.637387 | 1.457228 | 7.118281 | 1.85E-09 | 1.79E-05  | 11.11573 |
| VEGFA    | 2.130161 | 6.115789 | 6.932451 | 3.79E-09 | 2.45E-05  | 10.46624 |
| SLC2A3   | 1.505071 | 5.003346 | 6.775041 | 6.96E-09 | 3.38E-05  | 9.916189 |
| NDRG1    | 1.617525 | 6.440622 | 6.630888 | 1.21E-08 | 4.72E-05  | 9.41285  |
| PRTN3    | 1.139079 | 1.023452 | 6.492838 | 2.06E-08 | 6.69E-05  | 8.931435 |
| ANGPTL4  | 2.24873  | 5.75049  | 6.402846 | 2.92E-08 | 7.39E-05  | 8.61805  |
| ADM      | 2.05353  | 5.639502 | 6.391802 | 3.04E-08 | 7.39E-05  | 8.57962  |
| SLC16A3  | 1.202878 | 4.44432  | 5.946185 | 1.67E-07 | 0.000358  | 7.036142 |
| SH3D21   | 0.95611  | 2.41603  | 5.919918 | 1.84E-07 | 0.000358  | 6.945707 |
| HILPDA   | 1.544786 | 6.470118 | 5.829974 | 2.59E-07 | 0.000419  | 6.636613 |
| C15orf48 | 1.388418 | 2.38928  | 5.85138  | 2.39E-07 | 0.000419  | 6.710092 |
| FDFT1    | -0.76834 | 6.217089 | -5.7744  | 3.19E-07 | 0.000477  | 6.446115 |
| CXCL8    | 2.705008 | 5.01487  | 5.717504 | 3.95E-07 | 0.00048   | 6.251461 |
| DMBX1    | 1.025573 | 0.792375 | 5.72239  | 3.88E-07 | 0.00048   | 6.26816  |
| ALDOA    | 0.556687 | 9.413464 | 5.746566 | 3.54E-07 | 0.00048   | 6.350831 |
| ACTA2    | 1.237468 | 6.042694 | 5.671946 | 4.69E-07 | 0.000536  | 6.095912 |
| LOX      | 1.878106 | 4.42096  | 5.62636  | 5.57E-07 | 0.000601  | 5.940554 |
| GAPDH    | 0.696076 | 12.19559 | 5.54926  | 7.43E-07 | 0.000759  | 5.678482 |
| ELANE    | 0.974945 | 1.104168 | 5.407771 | 1.26E-06 | 0.001221  | 5.199967 |
| ADAM8    | 1.330341 | 2.779214 | 5.369484 | 1.45E-06 | 0.001341  | 5.071057 |
| S100A8   | 1.883479 | 5.365453 | 5.284745 | 1.98E-06 | 0.001648  | 4.78669  |
| SPAG4    | 1.228666 | 3.036866 | 5.285439 | 1.98E-06 | 0.001648  | 4.789014 |
| BHLHE40  | 1.122381 | 6.375533 | 5.272084 | 2.08E-06 | 0.001648  | 4.74432  |
| TNIP1    | 0.526421 | 6.032579 | 5.266401 | 2.12E-06 | 0.001648  | 4.725308 |
| TAGLN    | 1.39511  | 6.408789 | 5.244068 | 2.30E-06 | 0.00172   | 4.650666 |
| MYO1G    | 0.867613 | 1.94585  | 5.168833 | 3.03E-06 | 0.002182  | 4.399941 |
| S100A9   | 1.769407 | 7.310399 | 5.123101 | 3.58E-06 | 0.002267  | 4.248104 |
| CCL2     | 1.702223 | 6.424827 | 5.103555 | 3.85E-06 | 0.002267  | 4.183346 |
| HSPA6    | 1.492404 | 4.406986 | 5.107718 | 3.79E-06 | 0.002267  | 4.197129 |
| MT1H     | 1.386582 | 2.414813 | 5.104185 | 3.84E-06 | 0.002267  | 4.18543  |
| CCL7     | 1.165014 | 0.924016 | 5.109577 | 3.77E-06 | 0.002267  | 4.203289 |
| SPINK1   | 1.014723 | 0.821541 | 5.123952 | 3.57E-06 | 0.002267  | 4.250924 |
| ICAM1    | 1.419949 | 4.880692 | 5.094084 | 3.98E-06 | 0.002277  | 4.151993 |
| PTX3     | 1.800549 | 5.364877 | 5.085317 | 4.11E-06 | 0.002284  | 4.122991 |
| PDE4C    | 0.745726 | 0.837791 | 5.057272 | 4.56E-06 | 0.002459  | 4.030329 |
| MYADM    | 0.894315 | 5.793103 | 5.043292 | 4.79E-06 | 0.002517  | 3.984204 |
| GPRC5A   | 1.147473 | 1.964252 | 4.918352 | 7.53E-06 | 0.003752  | 3.573986 |
| NOCT     | 0.637375 | 3.019145 | 4.921315 | 7.45E-06 | 0.003752  | 3.583669 |
| MMP19    | 1.48943  | 2.606388 | 4.9041   | 7.93E-06 | 0.003833  | 3.52743  |
| SYTL2    | 0.849992 | 3.870353 | 4.898581 | 8.09E-06 | 0.003833  | 3.509412 |
| AQP9     | 1.52555  | 2.425489 | 4.881919 | 8.59E-06 | 0.003972  | 3.455068 |

---

|            |          |          |          |          |          |          |
|------------|----------|----------|----------|----------|----------|----------|
| PGK1       | 0.752069 | 8.583094 | 4.860959 | 9.26E-06 | 0.004149 | 3.386807 |
| ATP6V0D2   | 0.518054 | 0.57113  | 4.856802 | 9.40E-06 | 0.004149 | 3.37328  |
| SAA2       | 2.164145 | 2.258931 | 4.84226  | 9.90E-06 | 0.004274 | 3.326001 |
| LSR        | -0.88206 | 3.263011 | -4.83068 | 1.03E-05 | 0.004358 | 3.288397 |
| CHI3L2     | 1.752048 | 7.424755 | 4.777761 | 1.25E-05 | 0.005153 | 3.11696  |
| LDHA       | 0.739023 | 8.291437 | 4.771391 | 1.28E-05 | 0.005162 | 3.096371 |
| CXCL3      | 1.674936 | 2.26029  | 4.736205 | 1.45E-05 | 0.005616 | 2.982859 |
| MAFF       | 0.919576 | 3.794376 | 4.738139 | 1.44E-05 | 0.005616 | 2.98909  |
| FOSL2      | 0.998106 | 5.271192 | 4.711272 | 1.58E-05 | 0.005921 | 2.902627 |
| PKM        | 0.533554 | 9.173718 | 4.704859 | 1.62E-05 | 0.005921 | 2.88202  |
| ERVMER34-1 | -0.52108 | 0.820866 | -4.70754 | 1.60E-05 | 0.005921 | 2.890632 |
| EPS8L2     | 1.05378  | 3.101703 | 4.689809 | 1.70E-05 | 0.00613  | 2.833701 |
| DHCR7      | -0.60223 | 5.763146 | -4.64905 | 1.97E-05 | 0.006951 | 2.703174 |
| SLPI       | 1.730774 | 5.876077 | 4.602277 | 2.32E-05 | 0.007908 | 2.553952 |
| PPP1R15A   | 0.779166 | 6.014834 | 4.574502 | 2.56E-05 | 0.008373 | 2.465653 |
| NSDHL      | -0.32365 | 5.576345 | -4.57138 | 2.59E-05 | 0.008373 | 2.455755 |
| CHAC2      | -0.58895 | 3.565301 | -4.5801  | 2.51E-05 | 0.008373 | 2.483416 |
| SLC2A1     | 0.825753 | 6.835368 | 4.55875  | 2.70E-05 | 0.008451 | 2.415676 |
| ERO1A      | 0.756235 | 4.348181 | 4.554819 | 2.74E-05 | 0.008451 | 2.403218 |
| DTD2       | -0.48084 | 4.621518 | -4.55778 | 2.71E-05 | 0.008451 | 2.412593 |
| PTGS2      | 1.465925 | 2.702654 | 4.526868 | 3.02E-05 | 0.009173 | 2.314758 |
| INSIG2     | 0.509596 | 4.925389 | 4.50612  | 3.25E-05 | 0.00971  | 2.249251 |
| SQLE       | -0.71671 | 5.126541 | -4.48334 | 3.52E-05 | 0.010352 | 2.177496 |
| HMOX1      | 1.137996 | 7.566979 | 4.469959 | 3.68E-05 | 0.010526 | 2.135402 |
| IDI1       | -0.61924 | 5.55762  | -4.47007 | 3.68E-05 | 0.010526 | 2.13574  |
| FRAT2      | -0.42146 | 3.636038 | -4.4625  | 3.78E-05 | 0.010646 | 2.111965 |
| CPA4       | 0.877547 | 1.39224  | 4.455208 | 3.88E-05 | 0.010763 | 2.089079 |
| FSTL3      | 0.82907  | 4.248668 | 4.429569 | 4.24E-05 | 0.011279 | 2.008729 |
| LSP1       | 0.799638 | 4.34537  | 4.430697 | 4.22E-05 | 0.011279 | 2.012259 |
| ANKRD37    | 0.540991 | 3.055396 | 4.436815 | 4.13E-05 | 0.011279 | 2.031414 |
| TREM1      | 1.392705 | 2.926653 | 4.405465 | 4.61E-05 | 0.01145  | 1.933384 |
| SOCS3      | 1.388805 | 6.59799  | 4.414232 | 4.47E-05 | 0.01145  | 1.960767 |
| IER3       | 1.2072   | 4.870926 | 4.404525 | 4.62E-05 | 0.01145  | 1.930449 |
| PLIN2      | 1.084947 | 5.297021 | 4.401362 | 4.67E-05 | 0.01145  | 1.920578 |
| BCL3       | 1.026827 | 4.5514   | 4.406093 | 4.60E-05 | 0.01145  | 1.935343 |
| BNIP3      | 0.711487 | 5.805006 | 4.398723 | 4.71E-05 | 0.01145  | 1.912344 |
| TPI1       | 0.572901 | 9.80698  | 4.416214 | 4.44E-05 | 0.01145  | 1.96696  |
| CHRDL2     | 1.220591 | 1.568584 | 4.388778 | 4.88E-05 | 0.011562 | 1.881334 |
| PLOD2      | 0.85251  | 5.403197 | 4.38876  | 4.88E-05 | 0.011562 | 1.881279 |
| ARRDC3     | 0.780338 | 5.965739 | 4.383916 | 4.96E-05 | 0.011615 | 1.866187 |
| CA9        | 1.981298 | 4.229438 | 4.36548  | 5.29E-05 | 0.012228 | 1.808821 |
| GPI        | 0.546596 | 6.952772 | 4.361661 | 5.36E-05 | 0.012244 | 1.796951 |
| STAC2      | 1.435152 | 4.583399 | 4.347672 | 5.62E-05 | 0.012698 | 1.753516 |
| CA12       | 1.422572 | 4.881434 | 4.343054 | 5.71E-05 | 0.012753 | 1.739191 |

---

---

|          |          |          |          |          |          |          |
|----------|----------|----------|----------|----------|----------|----------|
| PPFIA4   | 0.766562 | 2.714568 | 4.338356 | 5.80E-05 | 0.012813 | 1.724627 |
| HMGCR    | -0.68425 | 4.895639 | -4.33452 | 5.88E-05 | 0.012836 | 1.712746 |
| FAS      | 0.892666 | 3.923334 | 4.318203 | 6.22E-05 | 0.013424 | 1.662233 |
| PI3      | 2.533114 | 4.546171 | 4.301291 | 6.59E-05 | 0.013982 | 1.609982 |
| HK3      | 1.001896 | 2.780482 | 4.299875 | 6.62E-05 | 0.013982 | 1.60561  |
| CXCL1    | 1.355667 | 2.476339 | 4.293621 | 6.76E-05 | 0.01413  | 1.586314 |
| GNA15    | 0.822062 | 3.72629  | 4.279395 | 7.10E-05 | 0.014675 | 1.542477 |
| SAA1     | 2.603744 | 5.196247 | 4.26661  | 7.42E-05 | 0.01501  | 1.503141 |
| COG2     | -0.41471 | 3.711126 | -4.26752 | 7.39E-05 | 0.01501  | 1.505923 |
| ASB3     | -0.36746 | 2.140153 | -4.25887 | 7.61E-05 | 0.015252 | 1.479347 |
| FTH1     | 0.555539 | 10.08441 | 4.246002 | 7.96E-05 | 0.015772 | 1.439853 |
| CXCL6    | 1.256118 | 1.181112 | 4.242758 | 8.04E-05 | 0.015785 | 1.429906 |
| ITGA5    | 0.825839 | 5.094998 | 4.232445 | 8.33E-05 | 0.016185 | 1.398303 |
| GLUL     | 0.728883 | 8.890784 | 4.215425 | 8.83E-05 | 0.016976 | 1.346234 |
| NEU4     | -1.41125 | 3.611223 | -4.20203 | 9.23E-05 | 0.01759  | 1.305337 |
| TREML2   | 0.313457 | 0.390846 | 4.179229 | 9.97E-05 | 0.018814 | 1.235846 |
| ZNF501   | -0.61719 | 3.181267 | -4.17424 | 0.000101 | 0.01895  | 1.22068  |
| ESM1     | 1.469407 | 3.426779 | 4.170593 | 0.000103 | 0.019002 | 1.209579 |
| PLK3     | 0.621034 | 4.565886 | 4.166779 | 0.000104 | 0.019066 | 1.197986 |
| SERPINE1 | 1.521886 | 7.257798 | 4.144664 | 0.000112 | 0.02027  | 1.130881 |
| KRT75    | 1.24006  | 1.31255  | 4.143033 | 0.000113 | 0.02027  | 1.12594  |
| CD14     | 0.954067 | 8.059386 | 4.113215 | 0.000125 | 0.022199 | 1.03577  |
| ABCG2    | -0.91129 | 4.675965 | -4.09013 | 0.000135 | 0.023764 | 0.966188 |
| ZFYVE28  | 0.463293 | 2.296661 | 4.082405 | 0.000138 | 0.024165 | 0.942953 |
| ZMYND8   | -0.38104 | 4.608262 | -4.07767 | 0.00014  | 0.024331 | 0.928729 |
| NDUFAF6  | -0.3784  | 3.453535 | -4.0709  | 0.000143 | 0.024667 | 0.908386 |
| THBD     | 1.041744 | 3.424523 | 4.064318 | 0.000147 | 0.024993 | 0.888638 |
| CXCL2    | 1.355914 | 3.498676 | 4.032532 | 0.000163 | 0.026928 | 0.793489 |
| CCN1     | 1.301079 | 6.839494 | 4.032071 | 0.000163 | 0.026928 | 0.792111 |
| NAMPT    | 1.201542 | 6.983366 | 4.028124 | 0.000165 | 0.026928 | 0.780325 |
| CH25H    | 1.16985  | 3.859281 | 4.02693  | 0.000166 | 0.026928 | 0.776762 |
| PDK1     | 0.577562 | 2.618979 | 4.02647  | 0.000166 | 0.026928 | 0.775387 |
| PRTFDC1  | -0.5707  | 5.688676 | -4.02687 | 0.000166 | 0.026928 | 0.776585 |
| MAFK     | 0.66009  | 3.921689 | 4.023551 | 0.000168 | 0.026965 | 0.766676 |
| HTR1B    | 0.360464 | 0.468348 | 4.017841 | 0.000171 | 0.027255 | 0.749648 |
| SPOCD1   | 1.514665 | 4.862999 | 4.009416 | 0.000176 | 0.027799 | 0.724542 |
| RRAS     | 0.692558 | 6.476934 | 4.006862 | 0.000177 | 0.027809 | 0.71694  |
| EDN3     | -1.18554 | 1.986817 | -4.00075 | 0.000181 | 0.02815  | 0.698759 |
| CLEC5A   | 1.086844 | 3.532927 | 3.987607 | 0.000189 | 0.028937 | 0.659691 |
| FDPS     | -0.43318 | 6.171073 | -3.98952 | 0.000188 | 0.028937 | 0.665382 |
| SOD2     | 1.226561 | 7.509337 | 3.982603 | 0.000192 | 0.029189 | 0.64484  |
| NOL3     | 0.69043  | 4.721947 | 3.978048 | 0.000195 | 0.029402 | 0.631327 |
| FN1      | 0.858782 | 7.761021 | 3.97024  | 0.0002   | 0.029937 | 0.608187 |
| CTSL     | 0.601971 | 7.742056 | 3.961493 | 0.000206 | 0.030117 | 0.582291 |

---

---

|          |          |          |          |          |          |          |
|----------|----------|----------|----------|----------|----------|----------|
| PMP22    | 0.579535 | 7.85781  | 3.962817 | 0.000205 | 0.030117 | 0.586208 |
| NET1     | -0.84301 | 3.859474 | -3.9633  | 0.000205 | 0.030117 | 0.587632 |
| CCL20    | 1.345245 | 1.859963 | 3.940293 | 0.000221 | 0.030677 | 0.51966  |
| PTPRU    | 0.997629 | 2.755461 | 3.942901 | 0.000219 | 0.030677 | 0.527355 |
| NRN1     | 0.850217 | 6.81421  | 3.948712 | 0.000215 | 0.030677 | 0.54451  |
| RETN     | 0.842479 | 1.168077 | 3.941348 | 0.00022  | 0.030677 | 0.522773 |
| USP41    | -0.3657  | 0.447397 | -3.94132 | 0.00022  | 0.030677 | 0.522682 |
| SLC52A3  | -0.77493 | 2.669107 | -3.94816 | 0.000215 | 0.030677 | 0.542889 |
| KRT17    | 1.104585 | 1.386543 | 3.933562 | 0.000226 | 0.030921 | 0.499813 |
| ATF3     | 0.863615 | 5.190553 | 3.934248 | 0.000225 | 0.030921 | 0.501834 |
| VRK1     | -0.60241 | 3.858348 | -3.92326 | 0.000234 | 0.03176  | 0.469466 |
| RAB42    | 0.589768 | 3.831257 | 3.920017 | 0.000236 | 0.031876 | 0.459931 |
| RCC2     | -0.47382 | 6.712956 | -3.91737 | 0.000238 | 0.031931 | 0.452156 |
| BIRC3    | 1.126003 | 2.424757 | 3.911744 | 0.000243 | 0.032083 | 0.435609 |
| SFXN3    | 0.31502  | 5.218822 | 3.912325 | 0.000242 | 0.032083 | 0.437317 |
| SLC39A14 | 0.803108 | 5.808272 | 3.90507  | 0.000248 | 0.032453 | 0.416008 |
| RTKN     | -0.59383 | 5.582287 | -3.90411 | 0.000249 | 0.032453 | 0.413183 |
| PCOLCE2  | 1.235911 | 3.031326 | 3.899664 | 0.000253 | 0.032708 | 0.400145 |
| MARCO    | 1.552789 | 2.196797 | 3.892722 | 0.000258 | 0.032937 | 0.379796 |
| P4HA2    | 0.733739 | 3.036112 | 3.889476 | 0.000261 | 0.032937 | 0.370285 |
| DNAJB1   | 0.615193 | 7.753463 | 3.889468 | 0.000261 | 0.032937 | 0.370262 |
| ZIC3     | -0.40498 | 0.887617 | -3.89099 | 0.00026  | 0.032937 | 0.374723 |
| LRRN1    | -1.03383 | 5.828472 | -3.88745 | 0.000263 | 0.032941 | 0.364341 |
| HAMP     | 1.260771 | 3.764406 | 3.882176 | 0.000267 | 0.033298 | 0.348916 |
| MYL9     | 0.956221 | 6.13853  | 3.879978 | 0.000269 | 0.033323 | 0.342488 |
| NUP35    | -0.4428  | 3.913779 | -3.87094 | 0.000277 | 0.033882 | 0.316056 |
| ACAT2    | -0.61752 | 4.859787 | -3.86906 | 0.000279 | 0.033882 | 0.310586 |
| ITM2A    | -0.96088 | 7.029363 | -3.86965 | 0.000278 | 0.033882 | 0.312295 |
| MT1G     | 1.011221 | 5.119819 | 3.862942 | 0.000285 | 0.034349 | 0.292721 |
| ANG      | 0.699804 | 3.509384 | 3.858173 | 0.000289 | 0.034671 | 0.278811 |
| HCAR2    | 0.667165 | 0.76721  | 3.849916 | 0.000297 | 0.035395 | 0.254753 |
| EXOG     | -0.40451 | 3.431685 | -3.84563 | 0.000301 | 0.035456 | 0.242276 |
| FCGBP    | 1.227206 | 6.493905 | 3.835373 | 0.000311 | 0.036014 | 0.212449 |
| SAA4     | 0.536831 | 0.43913  | 3.83526  | 0.000311 | 0.036014 | 0.212121 |
| CCT3     | -0.39316 | 7.827917 | -3.83536 | 0.000311 | 0.036014 | 0.212412 |
| FADS2    | -0.85692 | 7.095835 | -3.8299  | 0.000317 | 0.036428 | 0.196546 |
| PIK3R3   | -0.6732  | 4.218846 | -3.82431 | 0.000323 | 0.036875 | 0.180342 |
| ELP6     | -0.38488 | 5.359173 | -3.82174 | 0.000325 | 0.036966 | 0.172879 |
| MAFB     | 0.843047 | 5.844296 | 3.797887 | 0.000351 | 0.039465 | 0.103827 |
| IGFBP3   | 1.374256 | 7.427231 | 3.795261 | 0.000354 | 0.039572 | 0.09624  |
| GOS2     | 1.100783 | 4.763063 | 3.774651 | 0.000379 | 0.040017 | 0.036806 |
| STC1     | 1.083899 | 3.273018 | 3.769596 | 0.000385 | 0.040017 | 0.022255 |
| CNN1     | 0.955772 | 2.277582 | 3.773679 | 0.00038  | 0.040017 | 0.034005 |
| SYNPO    | 0.93575  | 5.164032 | 3.788596 | 0.000362 | 0.040017 | 0.076999 |

---

---

|          |          |          |          |          |          |          |
|----------|----------|----------|----------|----------|----------|----------|
| ITGB3    | 0.734505 | 1.790217 | 3.775631 | 0.000378 | 0.040017 | 0.039628 |
| PPP1R13L | 0.722735 | 2.962988 | 3.774457 | 0.000379 | 0.040017 | 0.036245 |
| TUBA1C   | 0.607607 | 6.289104 | 3.769405 | 0.000385 | 0.040017 | 0.021708 |
| FAM83G   | 0.517304 | 0.795159 | 3.782417 | 0.000369 | 0.040017 | 0.059178 |
| PDSS1    | -0.41918 | 3.403048 | -3.77589 | 0.000377 | 0.040017 | 0.040363 |
| KIZ      | -0.50473 | 4.44591  | -3.78588 | 0.000365 | 0.040017 | 0.069151 |
| INTS7    | -0.51093 | 4.253428 | -3.78693 | 0.000364 | 0.040017 | 0.072196 |
| FADS1    | -0.5898  | 5.293328 | -3.77003 | 0.000384 | 0.040017 | 0.023491 |
| SLC38A5  | -0.86348 | 5.663126 | -3.78467 | 0.000367 | 0.040017 | 0.065688 |
| CHI3L1   | 1.909975 | 10.89614 | 3.762936 | 0.000393 | 0.04064  | 0.003105 |
| SOX8     | -1.33849 | 6.562165 | -3.75209 | 0.000407 | 0.041856 | -0.02804 |
| TFDP2    | -0.50475 | 3.848267 | -3.74178 | 0.000421 | 0.043034 | -0.05759 |
| KDM1A    | -0.49756 | 6.068094 | -3.73838 | 0.000425 | 0.043278 | -0.06734 |
| PRSS23   | 0.735073 | 4.003625 | 3.733401 | 0.000432 | 0.043517 | -0.08159 |
| PINX1    | -0.32476 | 2.66522  | -3.73499 | 0.00043  | 0.043517 | -0.07704 |
| APEX1    | -0.43601 | 8.159888 | -3.72958 | 0.000438 | 0.043824 | -0.09251 |
| TOP2B    | -0.52638 | 6.455932 | -3.72132 | 0.000449 | 0.044766 | -0.11612 |
| FAM118B  | -0.41578 | 5.037457 | -3.71813 | 0.000454 | 0.044993 | -0.12523 |
| ZNF395   | 0.633517 | 4.988839 | 3.714462 | 0.000459 | 0.045292 | -0.13569 |
| FOSL1    | 1.104738 | 3.972629 | 3.708743 | 0.000468 | 0.045745 | -0.15199 |
| MYCN     | -1.12268 | 3.478746 | -3.70817 | 0.000469 | 0.045745 | -0.15363 |
| NUDT5    | -0.28912 | 4.730186 | -3.69529 | 0.000488 | 0.047422 | -0.19028 |
| VPS45    | -0.33463 | 5.2979   | -3.69053 | 0.000496 | 0.047906 | -0.20382 |
| GAS6     | 0.56926  | 5.038282 | 3.684216 | 0.000506 | 0.048158 | -0.22175 |
| GINS3    | -0.59397 | 3.351041 | -3.68614 | 0.000503 | 0.048158 | -0.2163  |
| TRIL     | -0.90367 | 5.670339 | -3.68536 | 0.000504 | 0.048158 | -0.2185  |
| PLAUR    | 0.792244 | 4.456599 | 3.679079 | 0.000514 | 0.048711 | -0.23632 |
| TCIM     | 0.914499 | 5.863574 | 3.674369 | 0.000522 | 0.049205 | -0.24968 |
| HK2      | 0.798505 | 5.016841 | 3.668891 | 0.000531 | 0.049461 | -0.2652  |
| PIM1     | 0.63896  | 5.233136 | 3.668172 | 0.000532 | 0.049461 | -0.26723 |
| RBM17    | -0.37314 | 4.985553 | -3.66485 | 0.000538 | 0.049746 | -0.27663 |

---
