# Supplementary figures and images for: Identification of Four Metabolic Subtypes of Glioma Based on Glycolysis-Cholesterol Synthesis Genes
Source: Hindawi journal article supplement (doi:10.1155/2022/9448144), 2022-02-21

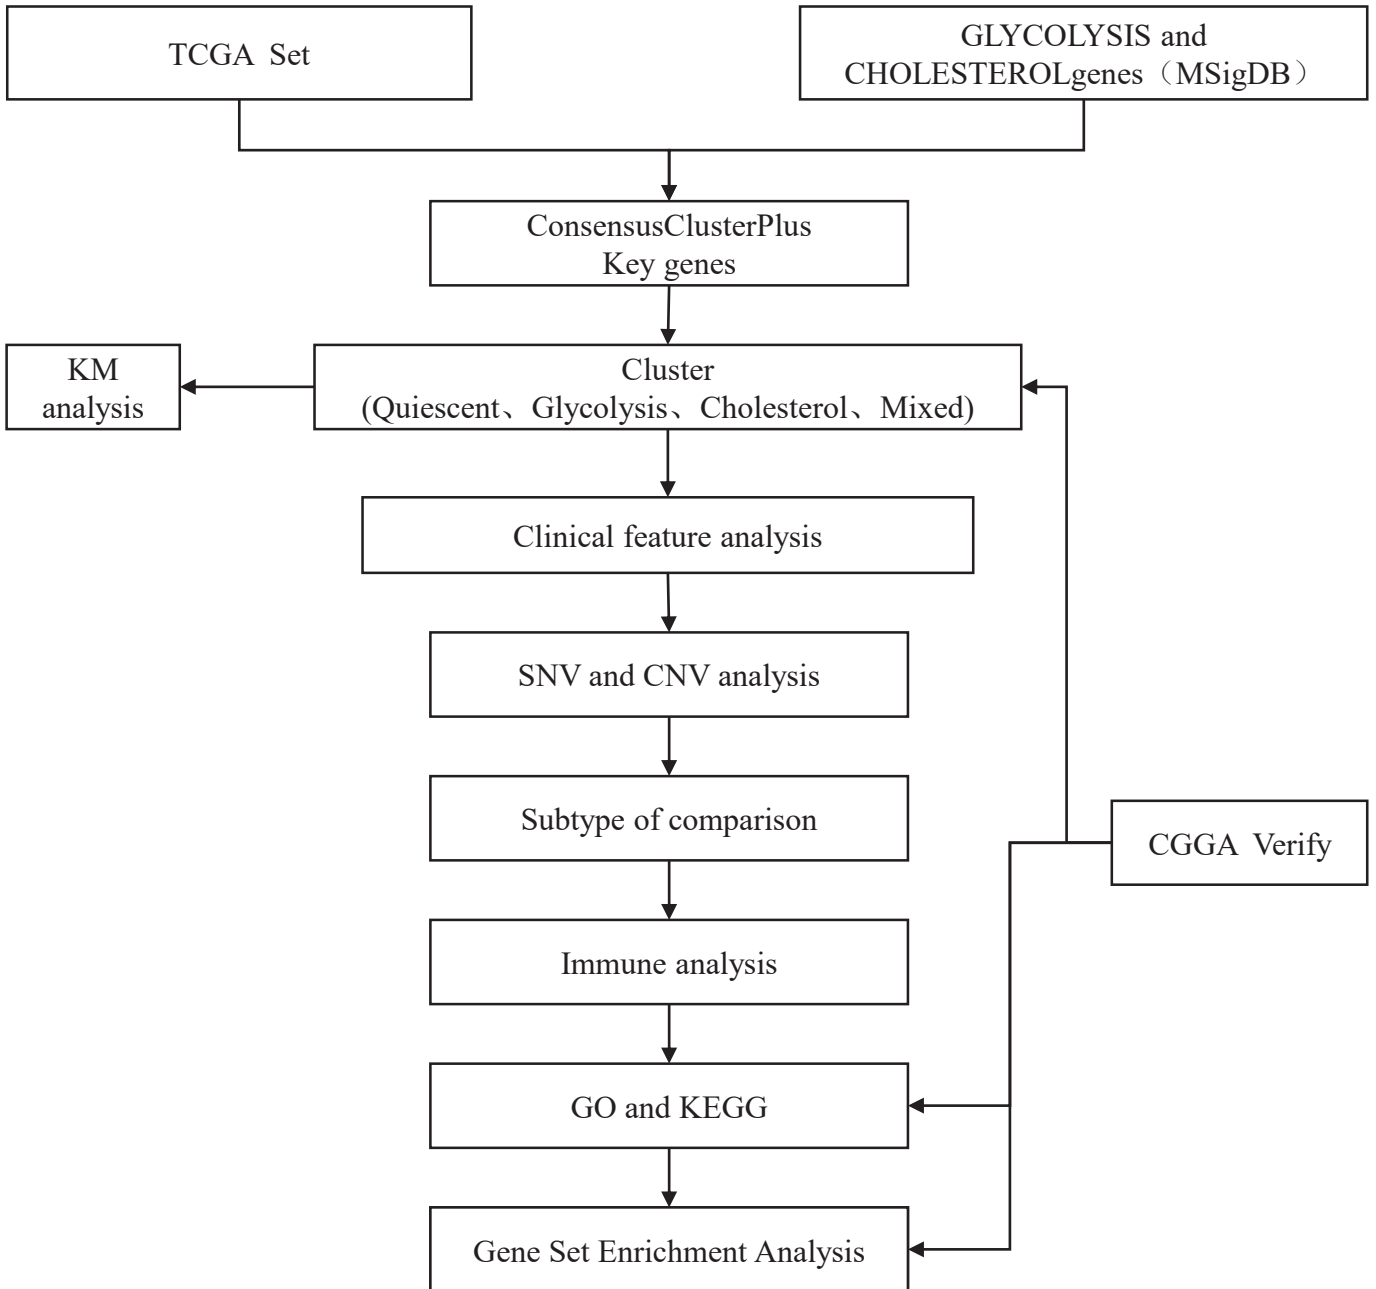

Supplement: f1 [file 9448144.f1.pdf]

A

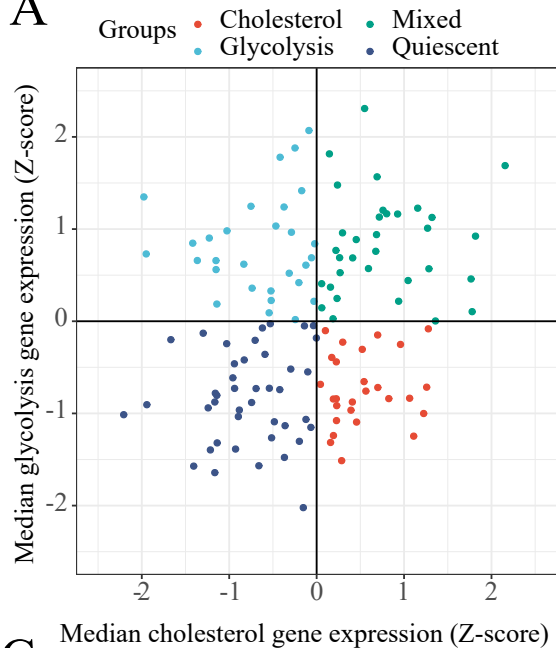

B

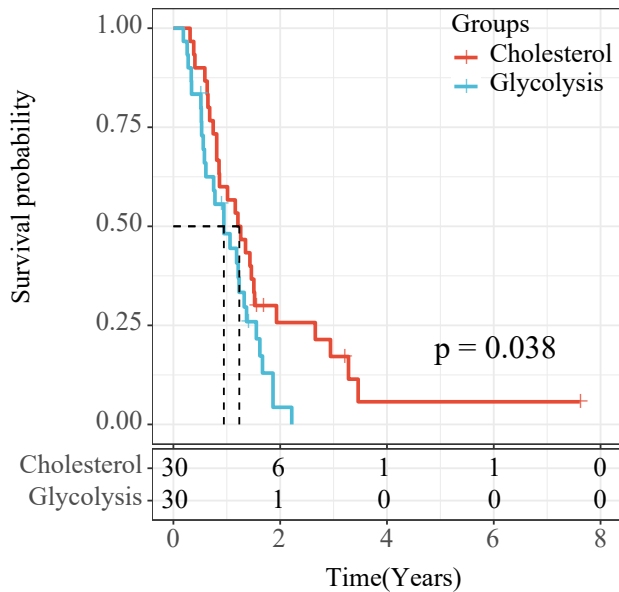

C

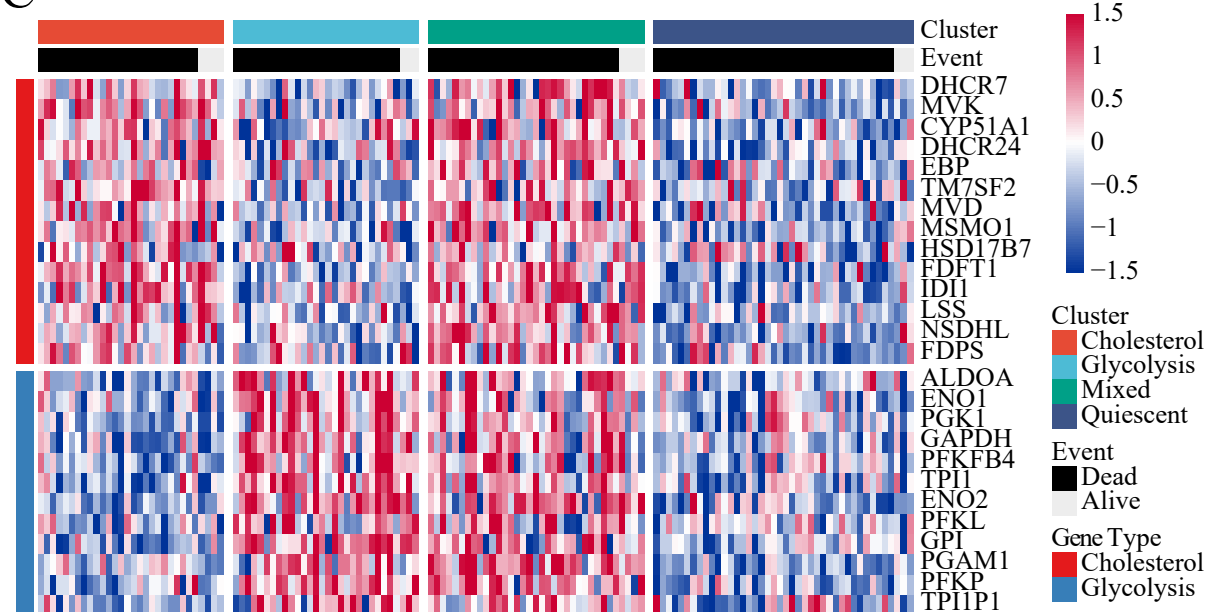

Supplement: f2 [file 9448144.f2.pdf]

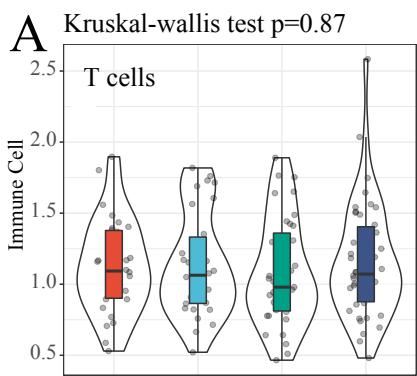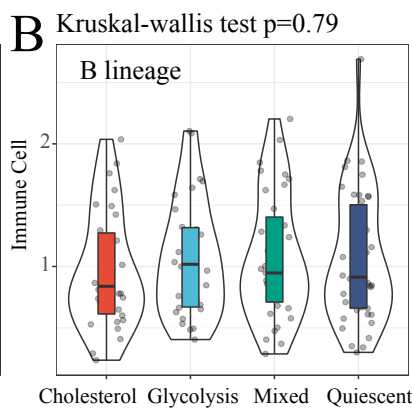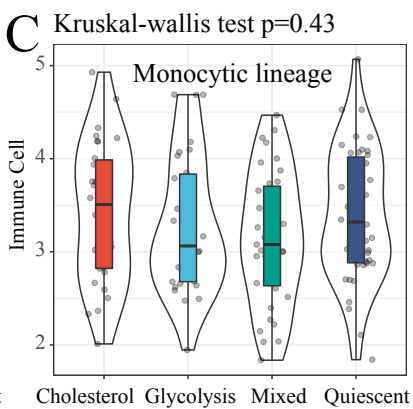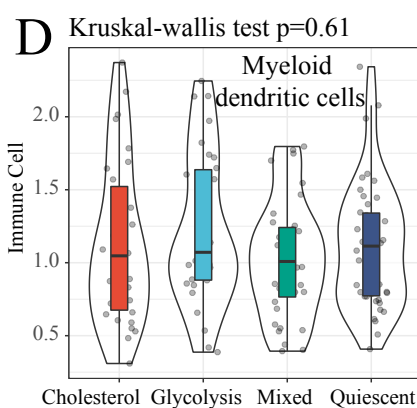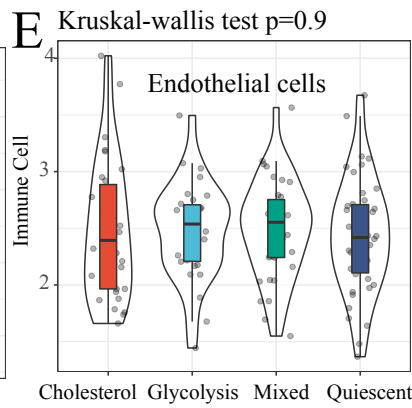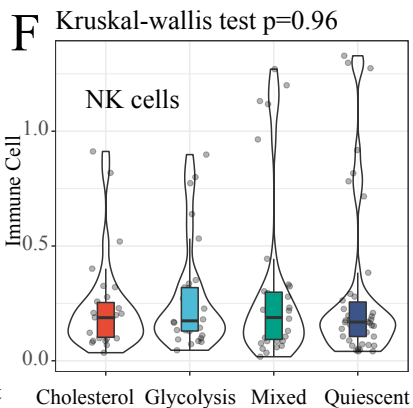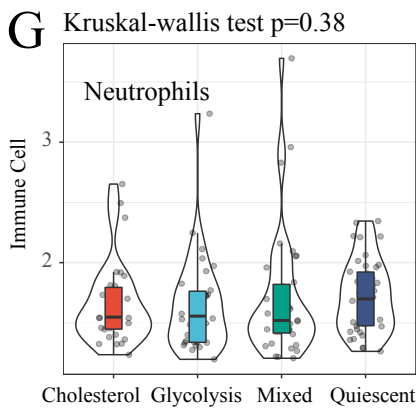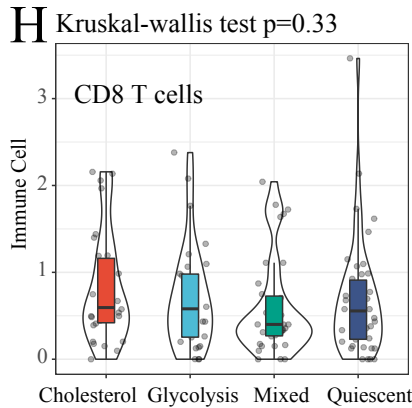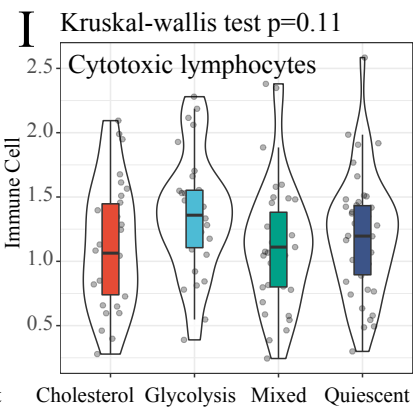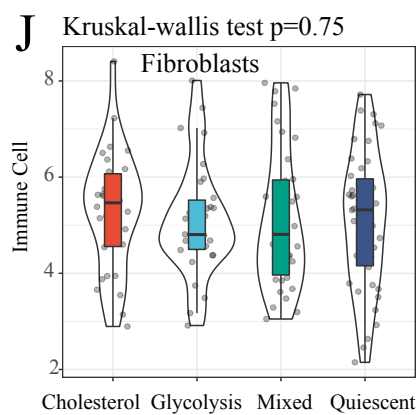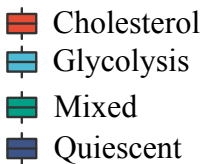

Supplement: f3 [file 9448144.f3.pdf]

## TCGA

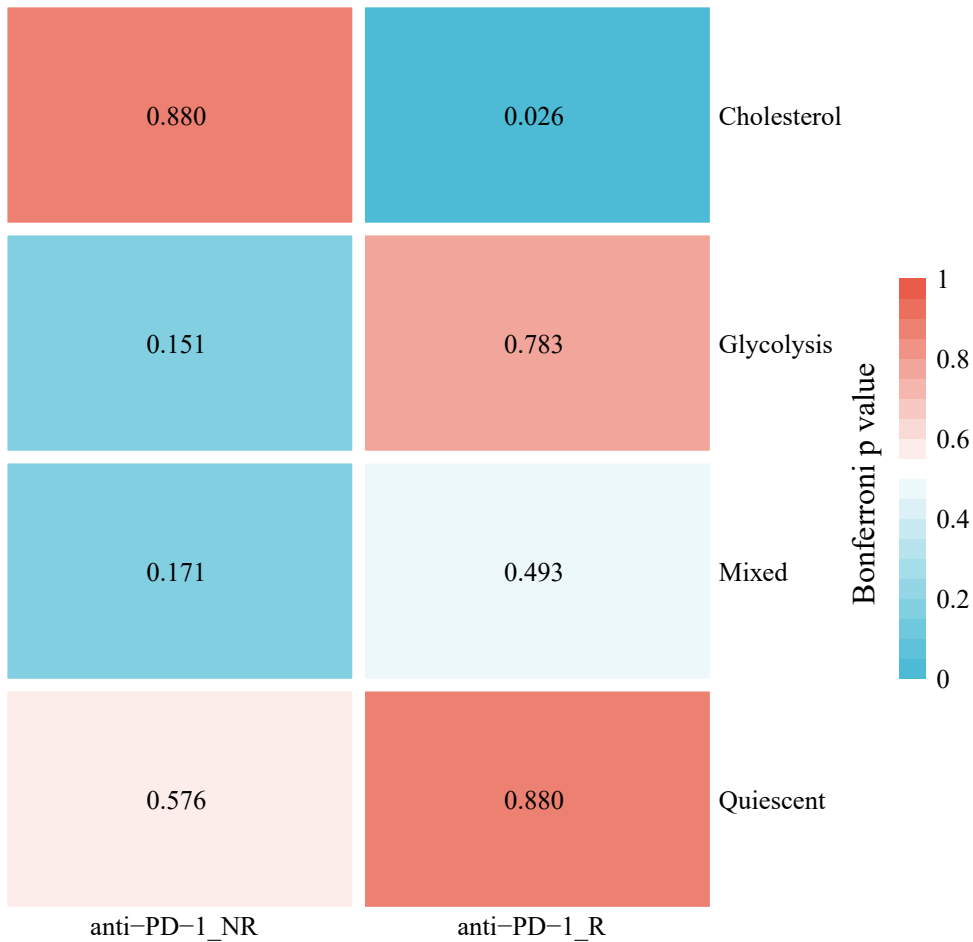

## CGGA325

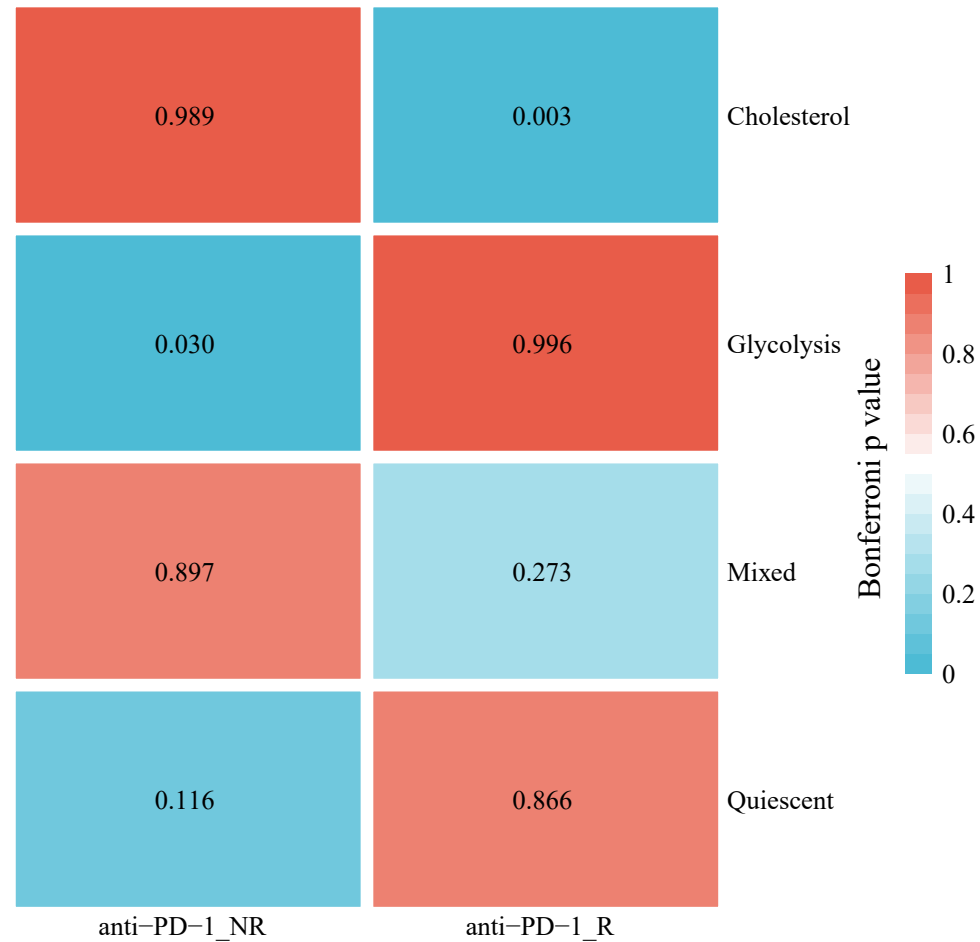

Supplement: f4 [file 9448144.f4.pdf]
